# Supplementary material for: Crebl2 regulates cell metabolism in muscle and liver cells
Source: PubMed Central journal article supplement (PMC6934747; doi:10.1038/s41598-019-56407-w), 2019-12-27

## Supplementary Information

### **Crebl2 regulates cell metabolism in muscle and liver cells**

Marcel Tiebe, Marilena Lutz, Deniz Senyilmaz Tiebe, and Aurelio A. Teleman

#### Contents

|                                            |     |
|--------------------------------------------|-----|
| 1. Supplementary Table Legends .....       | p.1 |
| 2. Legends for Supplementary Figures ..... | p.2 |
| 3. Supplementary Figures .....             | p.4 |

#### Supplementary Table Legends

**Suppl. Table 1:** Genes induced 2-fold by 12 h rapamycin treatment ( $p < 0.05$ ) in TSC2<sup>-/-</sup> MEFs treated with either control Renilla Luciferase siRNA or Crebl2 siRNA.

**Suppl. Table 2:** Gene ontology for genes listed in main Figure 1B.

**Suppl. Table 3:** Genes at least 2-fold upregulated ( $p < 0.05$ ) by Rapamycin in C2C12 myoblasts.

**Suppl. Table 4:** Genes at least 2-fold downregulated ( $p < 0.01$ ) by Crebl2 siRNA in C2C12 myoblasts.

**Suppl. Table 5:** Genes at least 2-fold upregulated ( $p < 0.01$ ) by Crebl2 siRNA in C2C12 myoblasts.

**Suppl. Table 6:** Genes at least 2-fold downregulated ( $p < 0.01$ ) by Crebl2 siRNA in Hepa1-6 cells.

**Suppl. Table 7:** Genes at least 2-fold upregulated ( $p < 0.01$ ) by Crebl2 siRNA in Hepa1-6 cells.

### **Legends for Supplementary Figures**

#### **Supplementary Figure 1: Cellular localization of Crebrf and Crebl2.**

**(A)** Expression of 3xHA-Crebrf in TSC2<sup>-/-</sup> MEFs. 3xHA-Crebrf shows nuclear and/or cytoplasmic localization, and this varies from cell to cell. FITC - anti-HA, blue - DAPI, red - Rhodamine-Phalloidin. Scale bar = 10 $\mu$ m.

**(B)** Expression of 3xHA-Crebrf in 293T HEK cells. 3xHA-Crebrf is predominantly cytoplasmic with some nuclear staining. FITC - anti-HA, blue - DAPI, magenta - Cy5-Phalloidin. Scale bar = 10 $\mu$ m.

**(C)** Expression of GFP-Crebrf in 293T HEK cells. GFP-Crebrf is predominantly nuclear. green - GFP signal, blue - DAPI, magenta - Cy5-Phalloidin. Scale bar = 10 $\mu$ m.

**(D)** Expression of V5-Crebl2 in TSC2<sup>-/-</sup> MEFs. V5-Crebl2 is predominantly nuclear and forms small speckles within the nucleus. green - anti-V5, blue - DAPI, red - Rhodamine-Phalloidin. Scale bar = 25 $\mu$ m.

**(E)** Expression of HA-Crebl2 in TSC2<sup>-/-</sup> MEFs. HA-Crebl2 localization varies between cells and is either cytoplasmic or nuclear. green - anti-HA, blue - DAPI, red - Rhodamine-Phalloidin. Scale bar = 25µm.

**(F)** Expression of myc-Crebl2 in TSC2<sup>-/-</sup> MEFs. myc-Crebl2 is nuclear and forms large nuclear speckles. green - anti-myc, blue - DAPI, red - Rhodamine-Phalloidin  
Scale bar = 25µm.

**Supplementary Figure 2: Crebrf induction upon rapamycin treatment and knockdown efficiency of Crebl2 in C2C12 and Hepa1-6 cells.**

**(A)** mRNA levels of Crebrf in C2C12 and Hepa1-6 cells treated with 20nM rapamycin for 14 and 12 hours, respectively.

**(B)** and **(C)** Knockdown of Crebl2 with siRNA #1 of Crebl2 for 2.5 days in C2C12 cells (B) or 3 days in Hepa1-6 cells (C).

Error bars: SD \*\*\*\*ttest<0.001

# Supplementary Figure 1

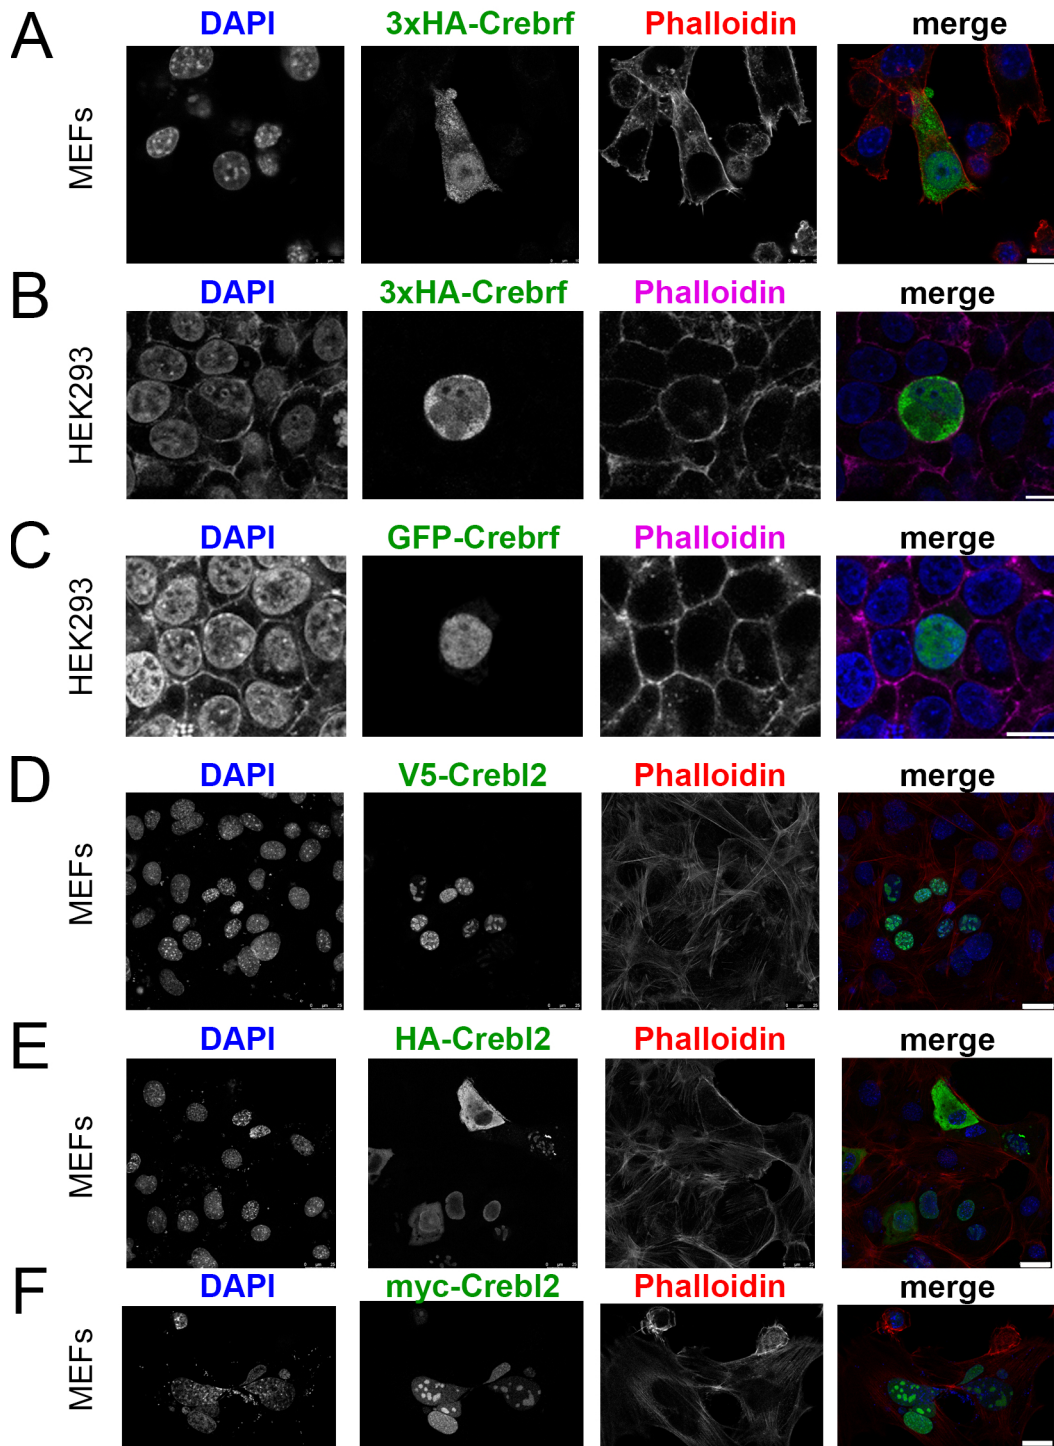

# Supplementary Figure 2

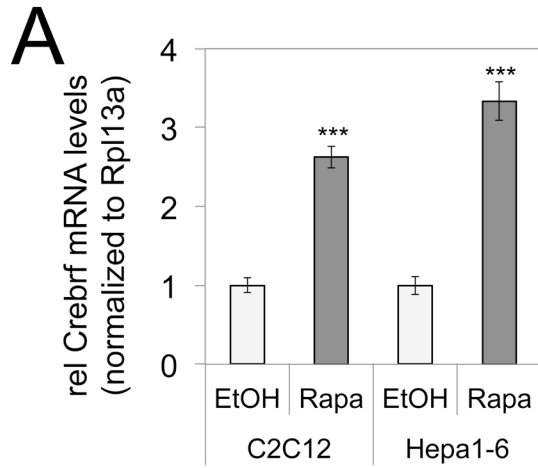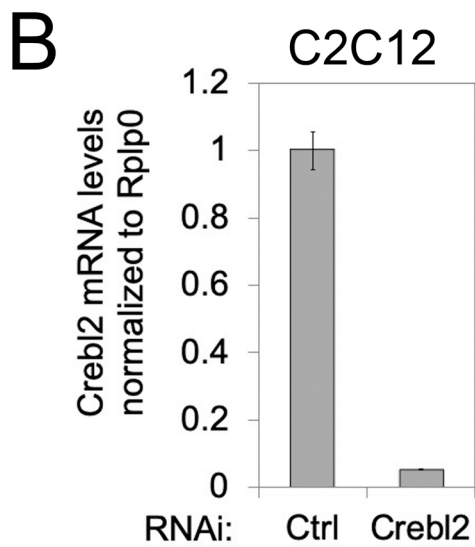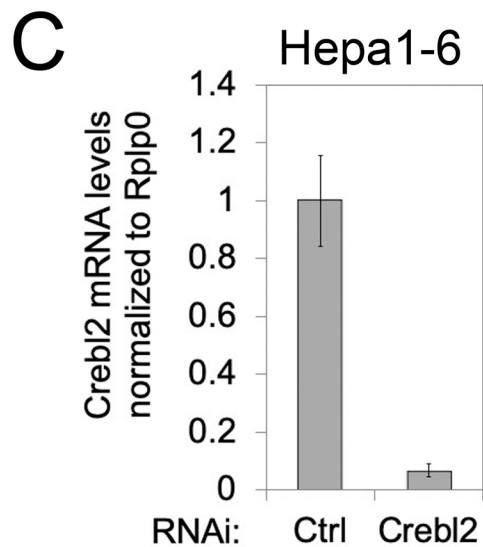

Supplement: 41598_2019_56407_MOESM1_ESM.pdf [file 41598_2019_56407_MOESM1_ESM.pdf]
